# Supplementary material for: Inter-annual variations of wet deposition in Beijing during 2014–2017: implications of below-cloud scavenging of inorganic aerosols
Source: Copernicus journal article supplement (doi:10.5194/acp-2020-1146), 2020-11-27
Supplement: Supplementary file 1 [file acp-2020-1146-supplement.pdf]

Table S1. Yearly average VWA concentration of major ions in precipitation from 1995 to 2017 in Beijing. Unit: ions ( $\mu\text{eq/L}$ ) and rainfall (mm)

| Year      | $\text{NO}_3^-$ | $\text{NH}_4^+$ | $\text{SO}_4^{2-}$ | $\text{Ca}^{2+}$ | Rainfall | References              |
|-----------|-----------------|-----------------|--------------------|------------------|----------|-------------------------|
| 1995-1998 | 54.5            | 135.1           | 359.0              | 464.0            | 609      | Yang et al. (2012)      |
| 2001-2005 | 105.9           | 236.0           | 314.1              | 209.0            | 441      | Yang et al. (2012)      |
| 2007-2010 | 111.1           | 237.3           | 234.9              |                  | 572      | Pan et al. (2012; 2013) |
| 2010      | 142.5           | 339.9           | 246.3              |                  | 438      | Pan et al. (2012; 2013) |
| 2014      | 102.2           | 262.9           | 173.7              | 72.3             | 460      | This study              |
| 2015      | 84.4            | 220.4           | 132.2              | 74.8             | 452      | This study              |
| 2016      | 90.0            | 215.4           | 127.4              | 82.6             | 670      | This study              |
| 2017      | 89.9            | 198.3           | 105.9              | 47.2             | 569      | This study              |

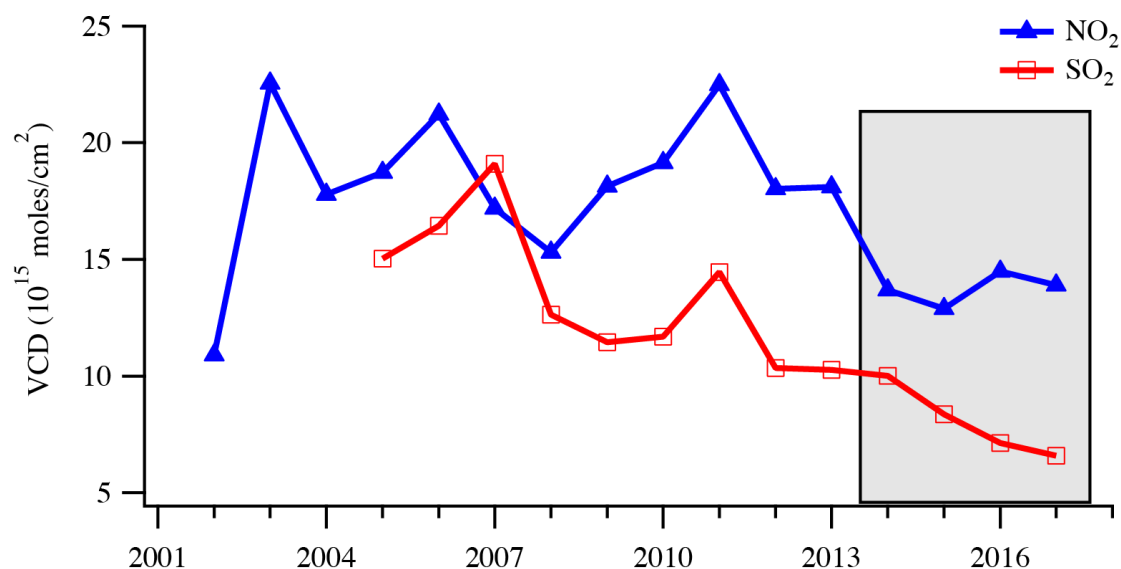

Figure S1. Long-term trend of the SO<sub>2</sub> and NO<sub>2</sub> VCD in Beijing from satellite observation, the shaded box area is the measurement period of fractional sampling in this study.

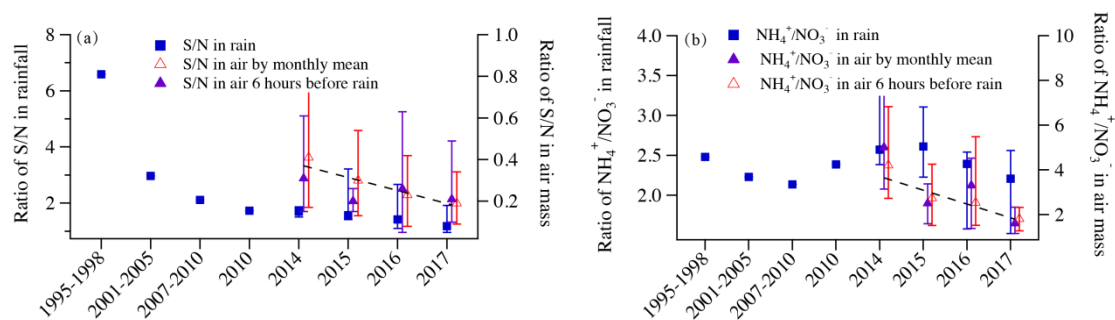

Figure S2. Annual variations in the ratio of sulfate to nitrate (a) and ammonium to nitrate (b) in aerosols and in precipitation. The ratios for aerosols are annual averaged concentration  $\pm \sigma/3$  in the 6 hours before rainfall events.
